# Supplementary material for: Serum and Pleural Soluble Cell Adhesion Molecules in Mesothelioma Patients: A Retrospective Cohort Study
Source: MDPI journal article supplement (doi:10.3390/cancers14122825), 2022-06-08
Supplement: s1 [file s1]

# Serum and pleural soluble cell adhesion molecules in mesothelioma patients: a retrospective cohort study

## SUPPLEMENTARY FILE

**Table S1.** Disease progression relative to demographics, clinical characteristics and serum and pleural soluble cell adhesion molecules levels in 92 mesothelioma patients. (Results derived from univariate analysis).

| Variables                                       |            |                         |              |
|-------------------------------------------------|------------|-------------------------|--------------|
| Baseline characteristics                        |            | HR (95% CI)             | P            |
| Gender                                          | Male (ref) |                         |              |
|                                                 | Female     | 0.90 (0.31-2.62)        | 0.843        |
| Age                                             |            | 1.01 (0.96-1.05)        | 0.724        |
| Smoker                                          | No (ref)   |                         |              |
|                                                 | Yes        | 0.82 (0.37-1.8)         | 0.623        |
| Asbestos exposure                               | No (ref)   |                         |              |
|                                                 | Yes        | 0.66 (0.29-1.5)         | 0.322        |
| Weight loss > 10%                               | No (ref)   |                         |              |
|                                                 | Yes        | 1.74 (0.74-4.06)        | 0.204        |
| Performance Status                              |            | <b>2.35 (1.33-4.14)</b> | <b>0.003</b> |
| Stage                                           |            | 1.24 (0.92-1.66)        | 0.651        |
| Initial presenting symptom                      |            |                         |              |
| Cough                                           | No (ref)   |                         |              |
|                                                 | Yes        | 0.8 (0.3-2.13)          | 0.651        |
| Dyspnea                                         | No (ref)   |                         |              |
|                                                 | Yes        | 2.31 (1.04-5.16)        | 0.041        |
| Thoracic pain                                   | No (ref)   |                         |              |
|                                                 | Yes        | 0.64 (0.29-1.43)        | 0.281        |
| Grade                                           | High (ref) |                         |              |
|                                                 | Low        | 0.63 (0.26-1.49)        | 0.291        |
| Radiation Therapy                               | No (ref)   |                         |              |
|                                                 | Yes        | 1.62 (0.58-4.54)        | 0.361        |
| Cancer location and spread on time of diagnosis |            |                         |              |
| Pleura                                          | No (ref)   |                         |              |
|                                                 | Right      | 0.36 (0.05-2.78)        | 0.328        |
|                                                 | Left       | 0.37 (0.05-3.04)        | 0.357        |
|                                                 | Bilateral  | 0.3 (0.03-3.42)         | 0.336        |
| Pericardium                                     | No (ref)   |                         |              |
|                                                 | Yes        | 0.96 (0.29-3.22)        | 0.951        |
| Peritoneum                                      | No (ref)   |                         |              |
|                                                 | Yes        | 1.55 (0.36-6.6)         | 0.555        |
| Bones                                           | No (ref)   |                         |              |
|                                                 | Yes        | 1.36 (0.53-3.45)        | 0.519        |
| Lymph nodes                                     | No (ref)   |                         |              |
|                                                 | Yes        | 1.31 (0.52-3.3)         | 0.563        |
| Lung                                            | No (ref)   |                         |              |
|                                                 | Yes        | 1.18 (0.53-2.6)         | 0.686        |
| Liver                                           | No (ref)   |                         |              |
|                                                 | Yes        | 2.44 (0.72-8.3)         | 0.154        |
| Another organ                                   | No (ref)   |                         |              |

|                                                                         |          |                          |              |
|-------------------------------------------------------------------------|----------|--------------------------|--------------|
|                                                                         | Yes      | 1.03 (0.24-4.37)         | 0.969        |
| <b>Cancer location and spread on follow up</b>                          |          |                          |              |
| Pleura                                                                  | No (ref) |                          |              |
|                                                                         | Yes      | 21.16 (0-299.79)         | 0.614        |
| Pericardium                                                             | No (ref) |                          |              |
|                                                                         | Yes      | 0.80 (0.18-3.5)          | 0.767        |
| Peritoneum                                                              | No (ref) |                          |              |
|                                                                         | Yes      | 0.04 (0.00-21.17)        | 0.315        |
| Bones                                                                   | No (ref) |                          |              |
|                                                                         | Yes      | 0.82 (0.29-2.28)         | 0.705        |
| Lymph nodes                                                             | No (ref) |                          |              |
|                                                                         | Yes      | <b>3.99 (1.49-10.66)</b> | <b>0.006</b> |
| Lung                                                                    | No (ref) |                          |              |
|                                                                         | Yes      | <b>2.91 (1.02-8.3)</b>   | <b>0.045</b> |
| Liver                                                                   | No (ref) |                          |              |
|                                                                         | Yes      | 1.54 (0.5-4.72)          | 0.453        |
| Brain                                                                   | No (ref) |                          |              |
|                                                                         | Yes      | 5.69 (0.73-44.46)        | 0.097        |
| Other organ                                                             | No (ref) |                          |              |
|                                                                         | Yes      | 0.04 (0.0-84.54)         | 0.416        |
| <b>Soluble cell adhesion molecules serum and pleural levels (ng/ml)</b> |          | <i>HR (95% CI)*</i>      | <i>P</i>     |
| sE-CADHERIN serum                                                       |          | 0.98 (0,9-1.07)          | 0.644        |
| sE-CADHERIN pleural                                                     |          | <b>1.08 (1,01-1.17)</b>  | <b>0.043</b> |
| sE-SELECTIN serum                                                       |          | 0.92 (0,81-1.04)         | 0.193        |
| sE-SELECTIN pleural                                                     |          | 0.96 (0,84-1.09)         | 0.514        |
| sICAM serum                                                             |          | 0.99 (0,96-1.03)         | 0.6          |
| sICAM pleural                                                           |          | 1.02 (0,98-1.05)         | 0.343        |
| sVCAM serum                                                             |          | 1.00 (0,95-1.06)         | 0.884        |
| sVCAM pleural                                                           |          | 0.96 (0,89-1.02)         | 0.197        |

HR (95% CI), hazard ratio (95% confidence intervals); sICAM, soluble intercellular adhesion molecules; ref, reference; sVCAM, soluble vascular cell adhesion molecules

\*per 10 units of increase

**Table S2.** Mortality relative to demographics, clinical characteristics and serum and pleural cell adhesion molecules levels in 92 mesothelioma patients. (Results derived from univariate analysis).

| Variables                                       |            |                          |                  |
|-------------------------------------------------|------------|--------------------------|------------------|
| Baseline characteristics                        |            | HR (95% CI)              | P                |
| Gender                                          | Male (ref) |                          |                  |
|                                                 | Female     | 0.65 (0.33-1.27)         | 0.204            |
| Age                                             |            | 1.02 (0.99-1.04)         | 0.197            |
| Smoker                                          | No (ref)   |                          |                  |
|                                                 | Yes        | 1.31 (0.79-2.15)         | 0.293            |
| Asbestos exposure                               | No (ref)   |                          |                  |
|                                                 | Yes        | 1.05 (0.63-1.73)         | 0.861            |
| Weight loss > 10%                               | No (ref)   |                          |                  |
|                                                 | Yes        | <b>2.47 (1.37-4.47)</b>  | <b>0.003</b>     |
| Performance Status                              |            | <b>2.47 (1.64-3.72)</b>  | <b>&lt;0.001</b> |
| Stage                                           |            | <b>1.36 (1.13-1.62)</b>  | <b>0.001</b>     |
| Initial presenting symptom                      |            |                          |                  |
| Cough                                           | No (ref)   |                          |                  |
|                                                 | Yes        | 0.94 (0.53-1.67)         | 0.844            |
| Dyspnea                                         | No (ref)   |                          |                  |
|                                                 | Yes        | 1.06 (0.65-1.75)         | 0.810            |
| Thoracic pain                                   | No (ref)   |                          |                  |
|                                                 | Yes        | 1.22 (0.75-1.97)         | 0.425            |
| Grade                                           | High (ref) |                          |                  |
|                                                 | Low        | <b>0.56 (0.33-0.94)</b>  | <b>0.028</b>     |
| Radiation Therapy                               | No (ref)   |                          |                  |
|                                                 | Yes        | 0.67 (0.34-1.32)         | 0.245            |
| Cancer location and spread on time of diagnosis |            |                          |                  |
| Pleura                                          | No (ref)   |                          |                  |
|                                                 | Right      | 0.23 (0.03-1.79)         | 0.162            |
|                                                 | Left       | 0.23(0.03-1.77)          | 0.157            |
|                                                 | Bilateral  | 0.18(0.02-1.58)          | 0.121            |
| Pericardium                                     | No (ref)   |                          |                  |
|                                                 | Yes        | 1.5 (0.68-3.32)          | 0.317            |
| Peritoneum                                      | No (ref)   |                          |                  |
|                                                 | Yes        | <b>4.37 (1.82-10.48)</b> | <b>0.001</b>     |
| Bones                                           | No (ref)   |                          |                  |
|                                                 | Yes        | <b>3.86 (2.04-7.32)</b>  | <b>&lt;0.001</b> |
| Lymph nodes                                     | No (ref)   |                          |                  |
|                                                 | Yes        | <b>2.04 (1.11-3.75)</b>  | <b>0.022</b>     |
| Lung                                            | No (ref)   |                          |                  |
|                                                 | Yes        | 1.1 (0.67-1.79)          | 0.714            |
| Liver                                           | No (ref)   |                          |                  |
|                                                 | Yes        | <b>8.28 (3.14-21.86)</b> | <b>&lt;0.001</b> |
| Another organ                                   | No (ref)   |                          |                  |
|                                                 | Yes        | <b>2.67 (1.18-6.02)</b>  | <b>0.018</b>     |
| Cancer location and spread on follow up         |            |                          |                  |
| Pleura                                          | No (ref)   |                          |                  |
|                                                 | Yes        | 1.04 (0.14-7.61)         | 0.971            |
| Pericardium                                     | No (ref)   |                          |                  |
|                                                 | Yes        | 1.07 (0.5-2.29)          | 0.860            |
| Peritoneum                                      | No (ref)   |                          |                  |

|                                                                         |          |                      |          |
|-------------------------------------------------------------------------|----------|----------------------|----------|
|                                                                         | Yes      | 0.96 (0.41-2.28)     | 0.933    |
| Bones                                                                   | No (ref) |                      |          |
|                                                                         | Yes      | 1.49 (0.84-2.64)     | 0.170    |
| Lymph nodes                                                             | No (ref) |                      |          |
|                                                                         | Yes      | 1.37 (0.77-2.44)     | 0.291    |
| Lung                                                                    | No (ref) |                      |          |
|                                                                         | Yes      | 0.7 (0.39-1.25)      | 0.231    |
| Liver                                                                   | No (ref) |                      |          |
|                                                                         | Yes      | 1.22 (0.6-2.48)      | 0.587    |
| Brain                                                                   | No (ref) |                      |          |
|                                                                         | Yes      | 0.66 (0.09-4.85)     | 0.684    |
| Other organ                                                             | No (ref) |                      |          |
|                                                                         | Yes      | 0.77 (0.27-2.17)     | 0.622    |
| <b>Soluble cell adhesion molecules serum and pleural levels (ng/ml)</b> |          | <i>HR (95% CI) *</i> | <i>P</i> |
| sE-CADHERIN serum                                                       |          | 0.96 (0.91-1.02)     | 0.168    |
| sE-CADHERIN pleural                                                     |          | 1.03 (0.98-1.09)     | 0.235    |
| sE-SELECTIN serum                                                       |          | 0.95 (0.88-1.03)     | 0.231    |
| sE-SELECTIN pleural                                                     |          | 0.94 (0.87-1.02)     | 0.139    |
| sICAM serum                                                             |          | 0.99 (0.96-1.01)     | 0.235    |
| sICAM pleural                                                           |          | 1.01 (0.99-1.03)     | 0.501    |
| sVCAM serum                                                             |          | 1.00 (0.96-1.03)     | 0.895    |
| sVCAM pleural                                                           |          | 0.99 (0.96-1.03)     | 0.707    |

HR (95% CI), hazard ratio (95% confidence intervals); sICAM, soluble intercellular adhesion molecules; ref, reference; sVCAM, soluble vascular cell adhesion molecules

\*per 10 units of increase

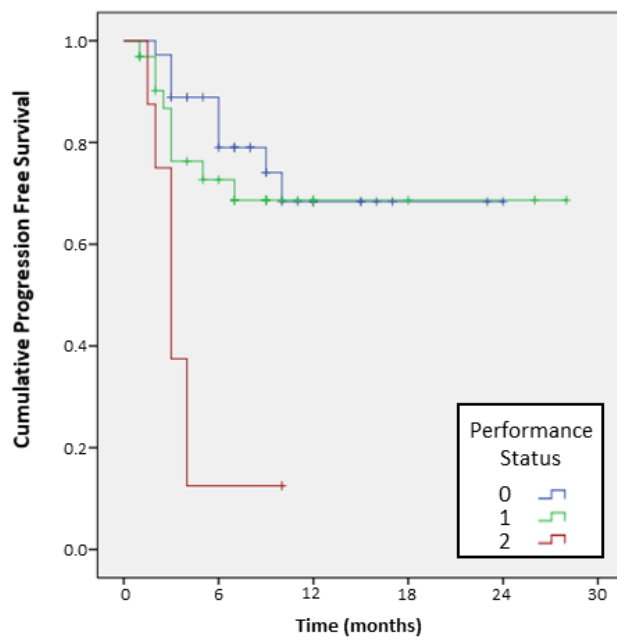

**Figure S1.** Kaplan-Meier plot demonstrating disease progression per performance status group.

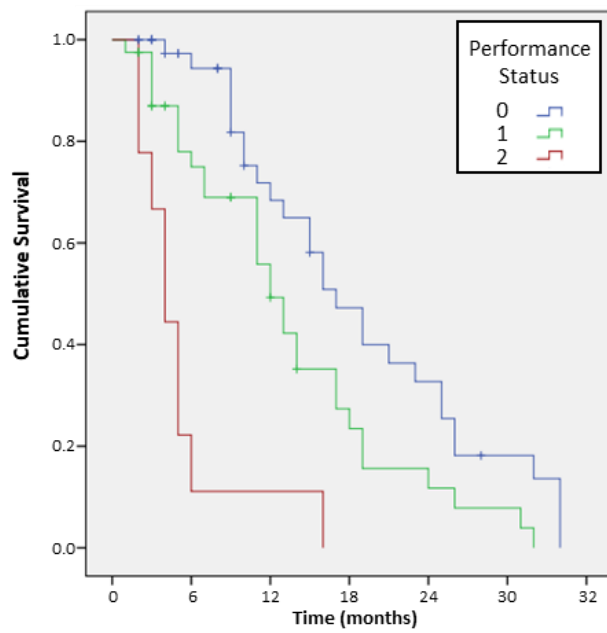

**Figure S2.** Kaplan-Meier plot demonstrating mortality per performance status group.
